# Supplementary material
Source: Springer Nature journal article supplement (https://www.springermedizin.de/resource/supplementary/12874_2011_641_MOESM5_ESM.pdf/9432304)

### Polytomous Regression

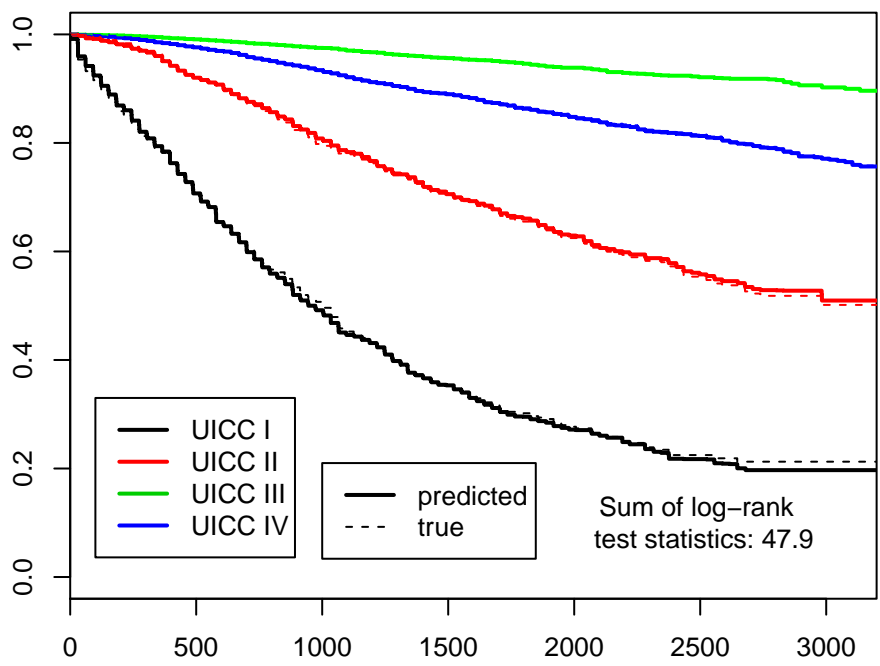

### Predictive Mean Matching

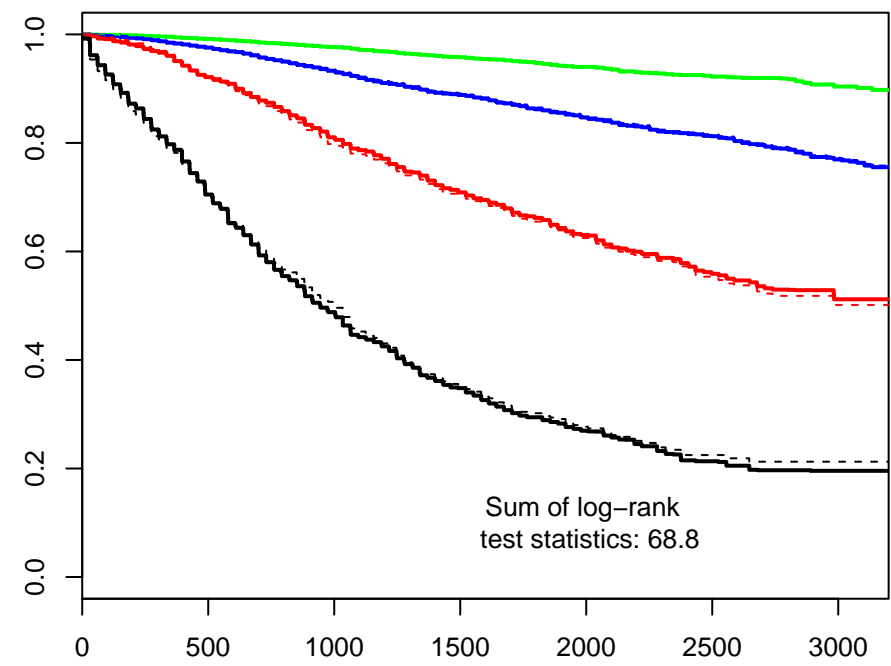

### Random Forest

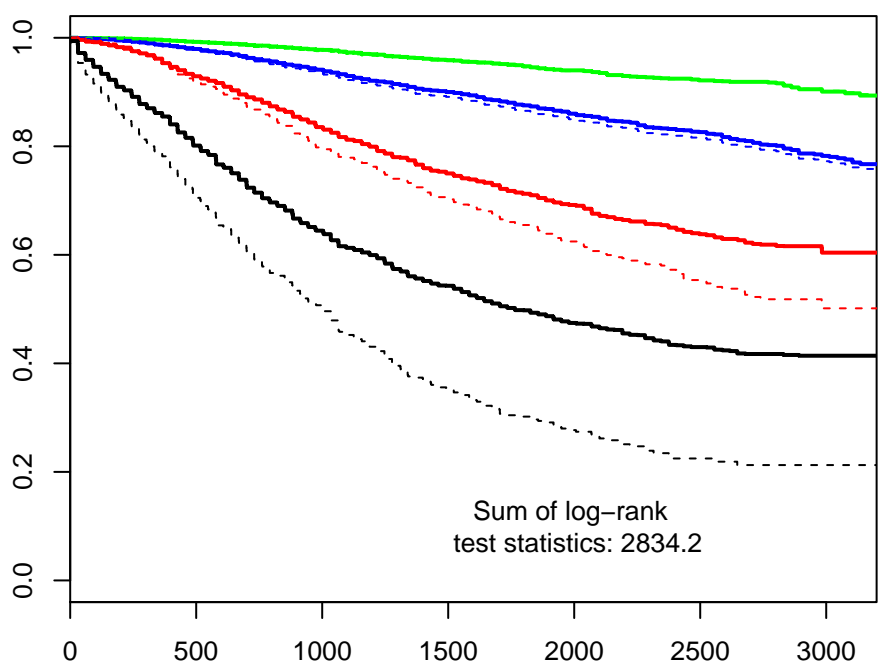

### Proportional Sampling

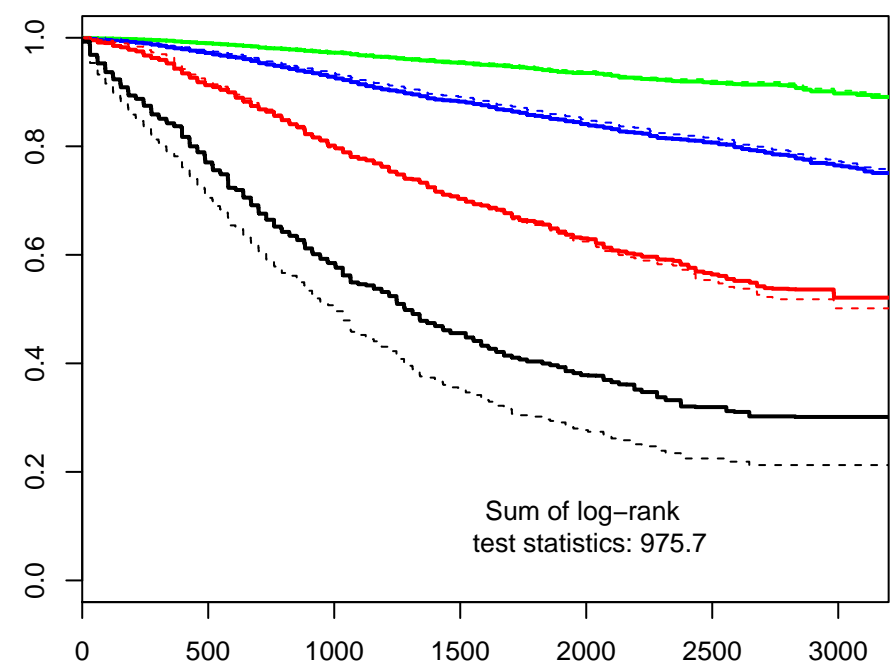

Supplement: MOESM5 [file 9432304]
